# Supplementary material
Source: ML conference proceedings conference paper supplement (https://openreview.net/forum?id=BGfLS_8j5eq)

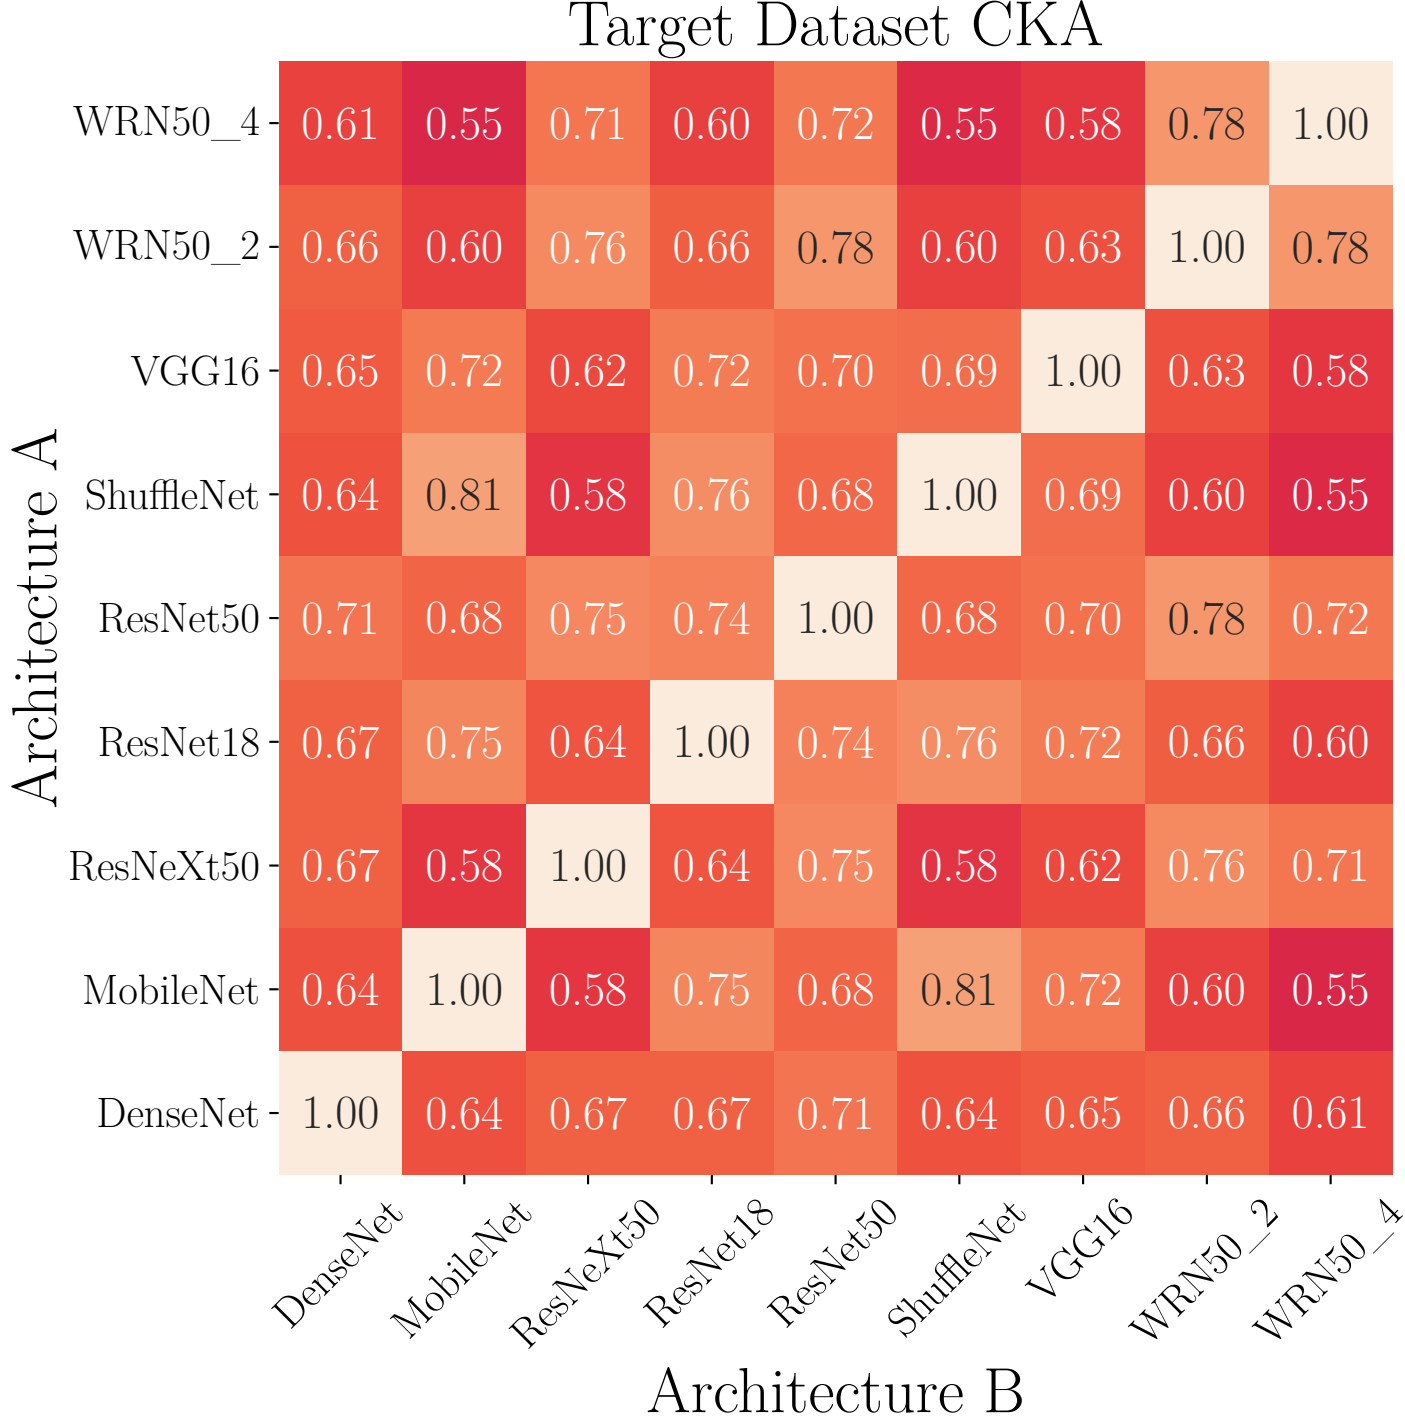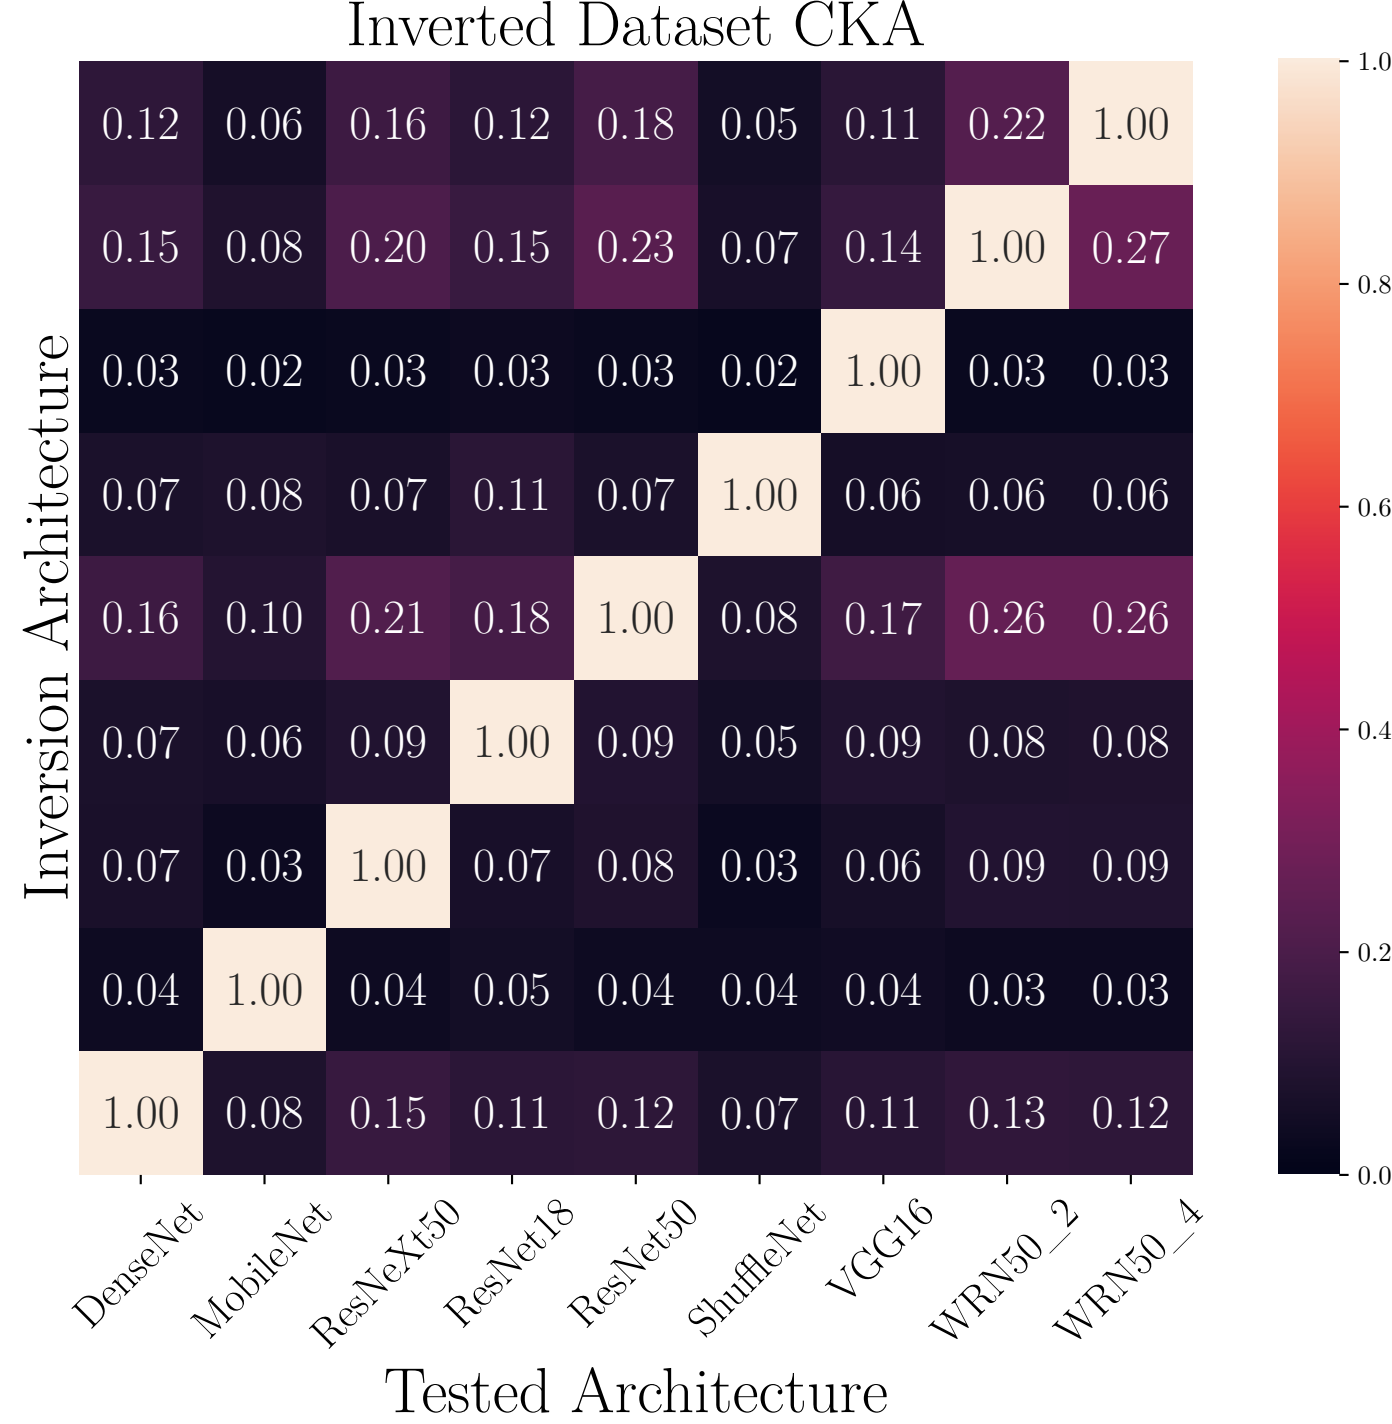

Supplement: supplementary_material [file attachment]

# Head/Body Disagree

Agreement

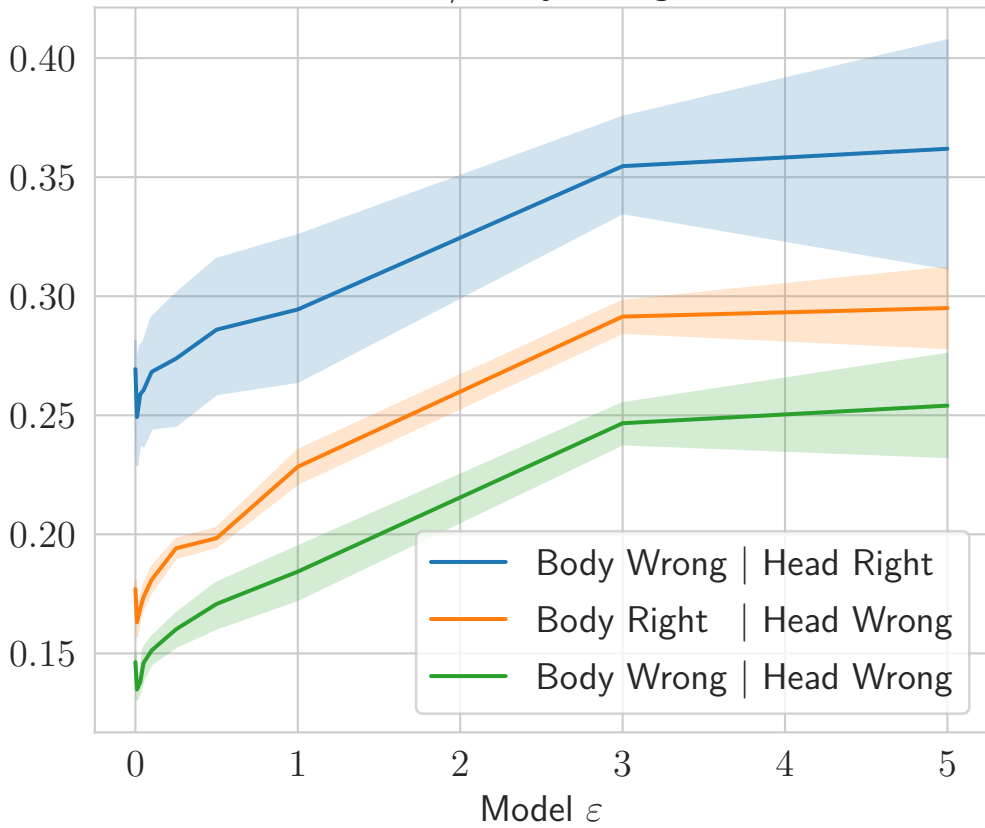

Supplement: supplementary_material [file attachment]

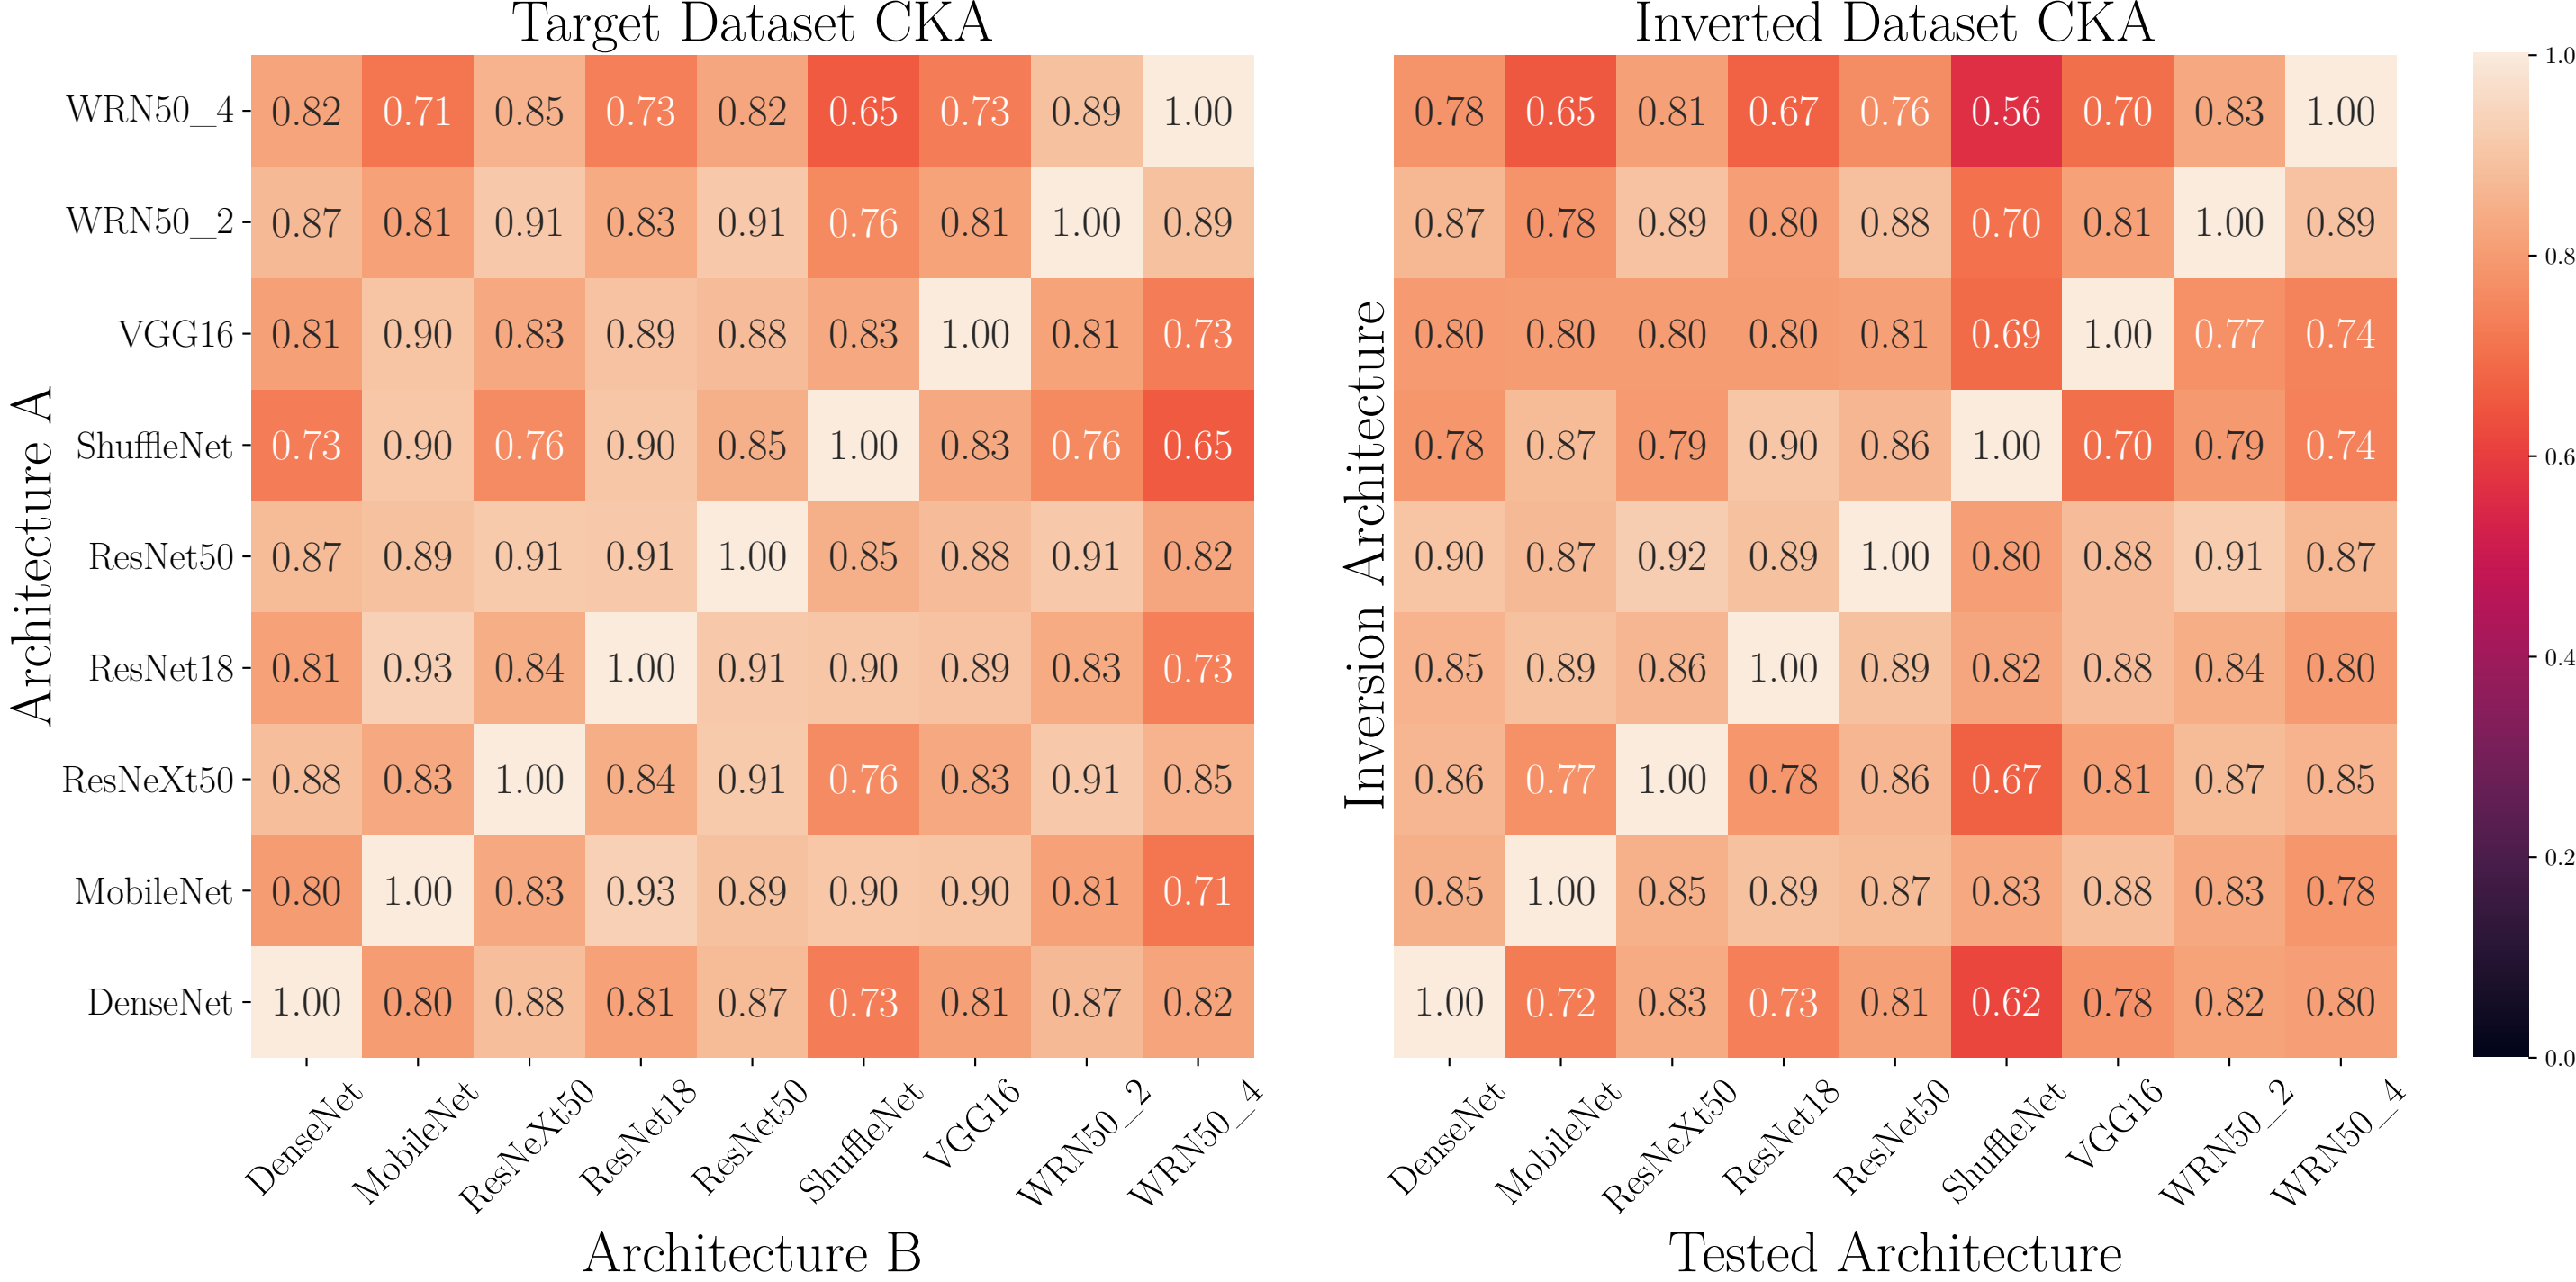

Supplement: supplementary_material [file attachment]

WRN50-4,  $\varepsilon = 0.0$

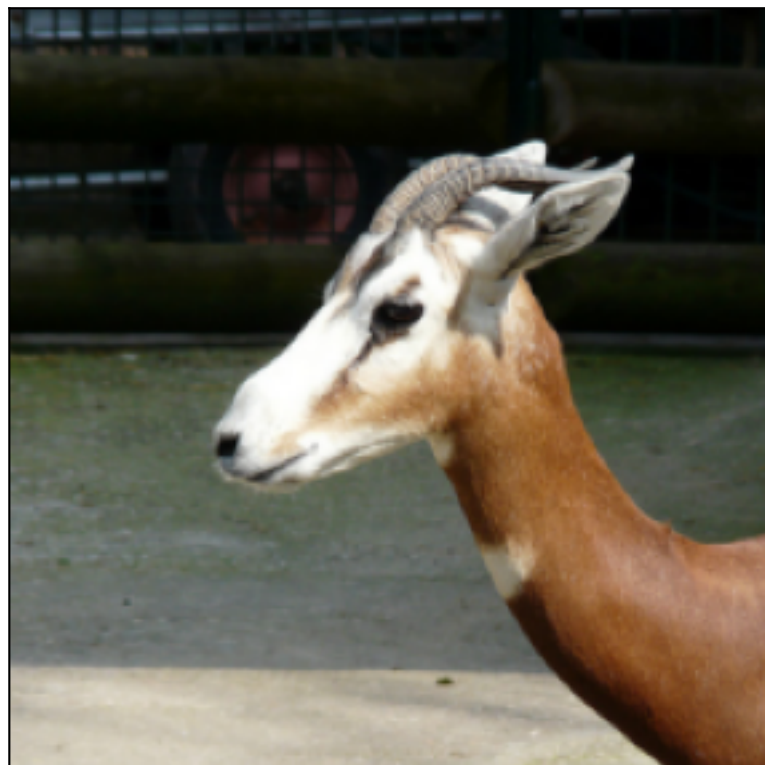

+

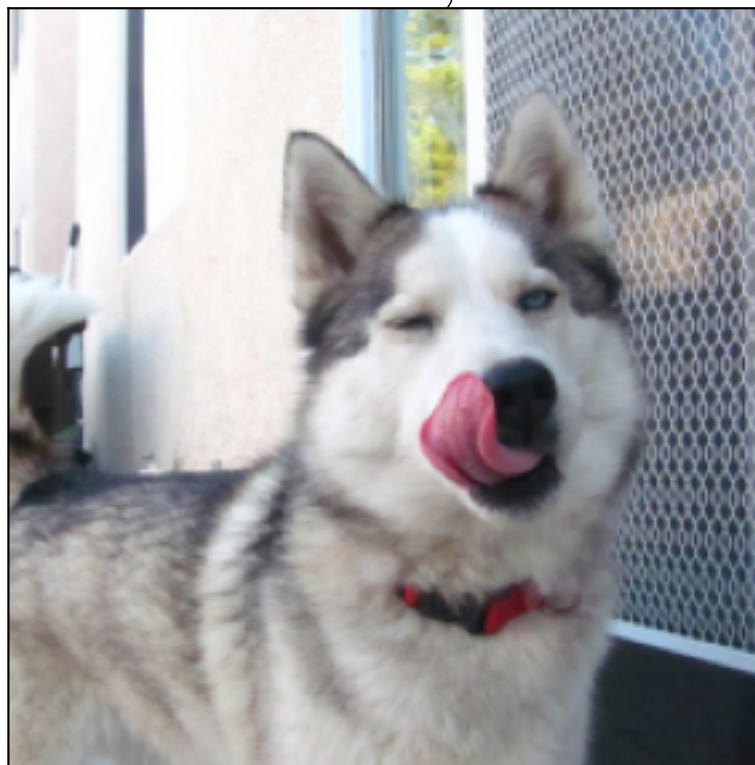

→

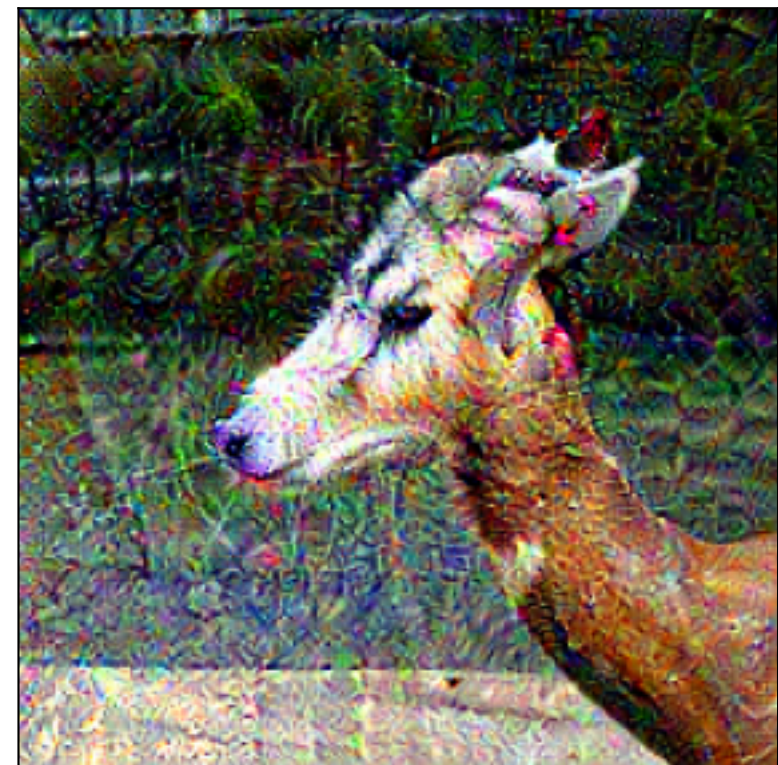

WRN50-4,  $\varepsilon = 5.0$

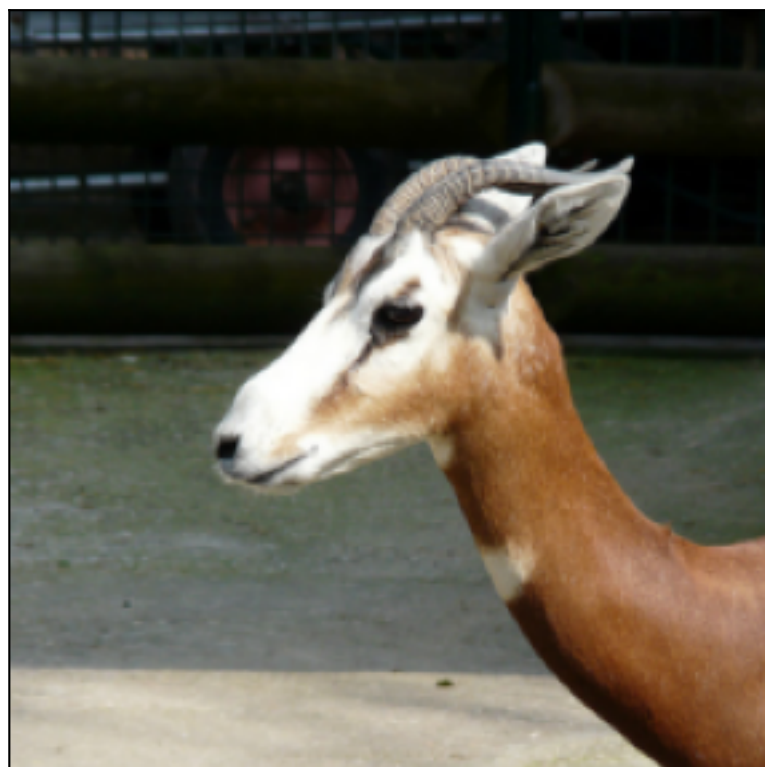

+

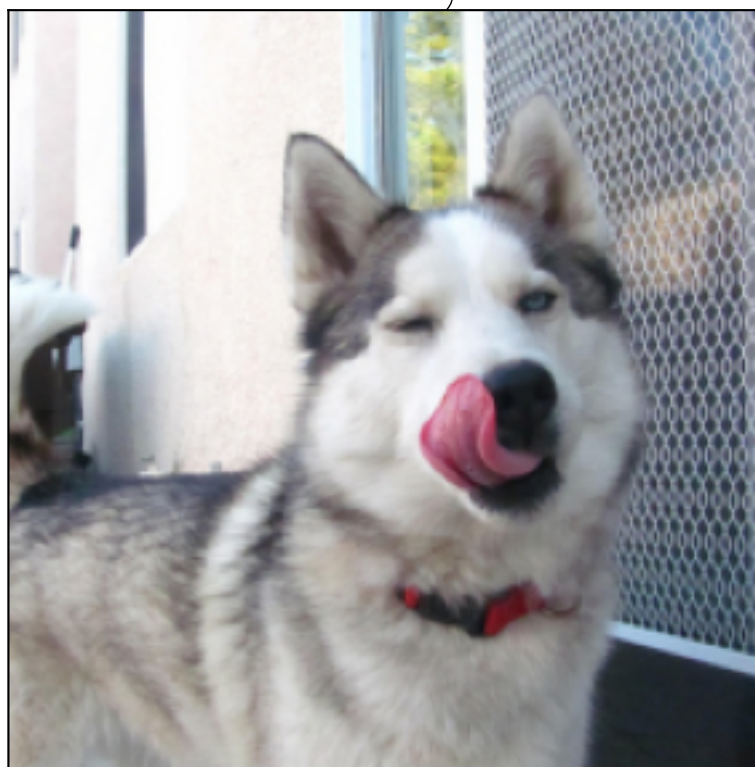

→

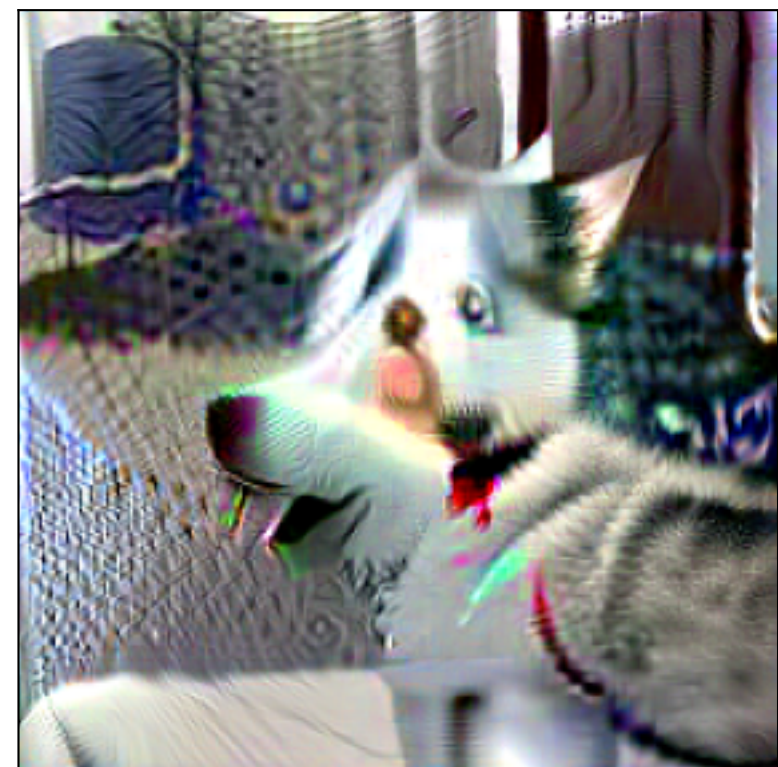

(a) Seed image

(b) Target image

(c) Inverted image

Supplement: supplementary_material [file attachment]

# Cosine Similarity of Model Gradients

Cosine Similarity

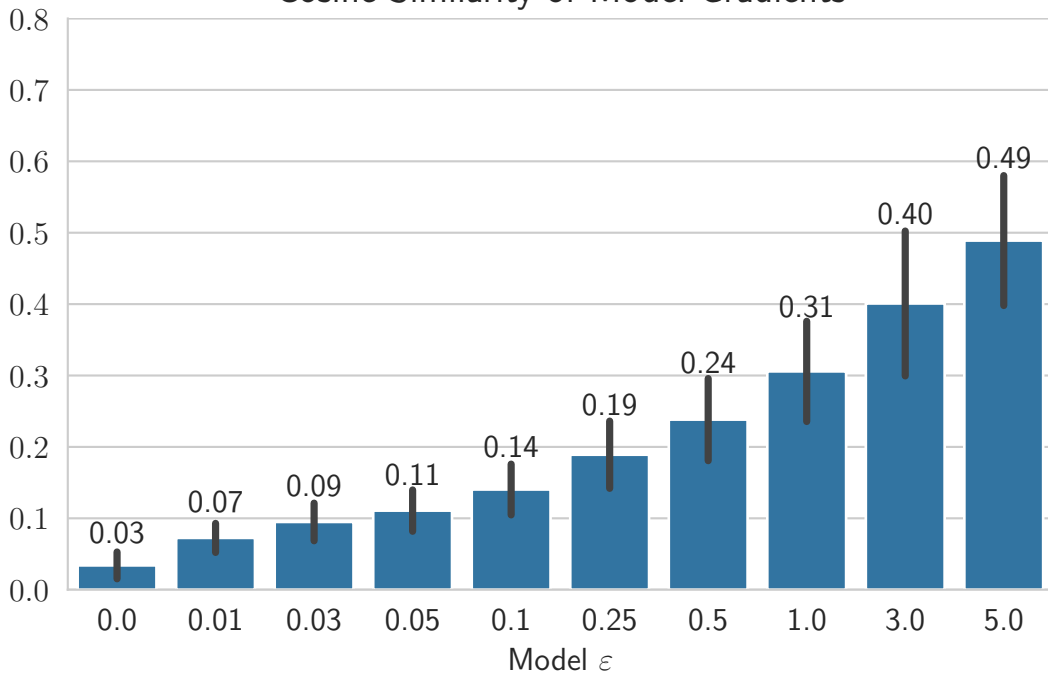

Supplement: supplementary_material [file attachment]

## Tested Architecture

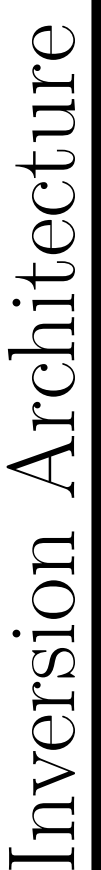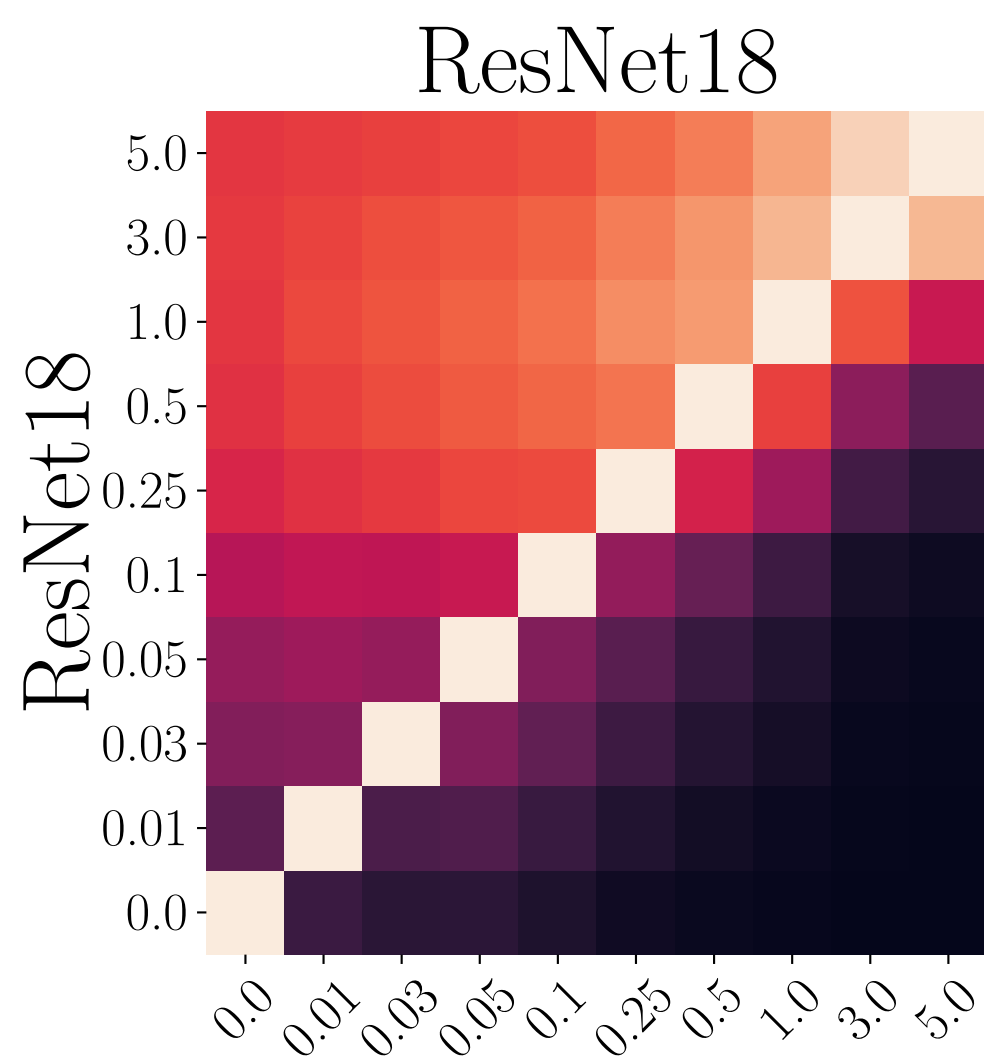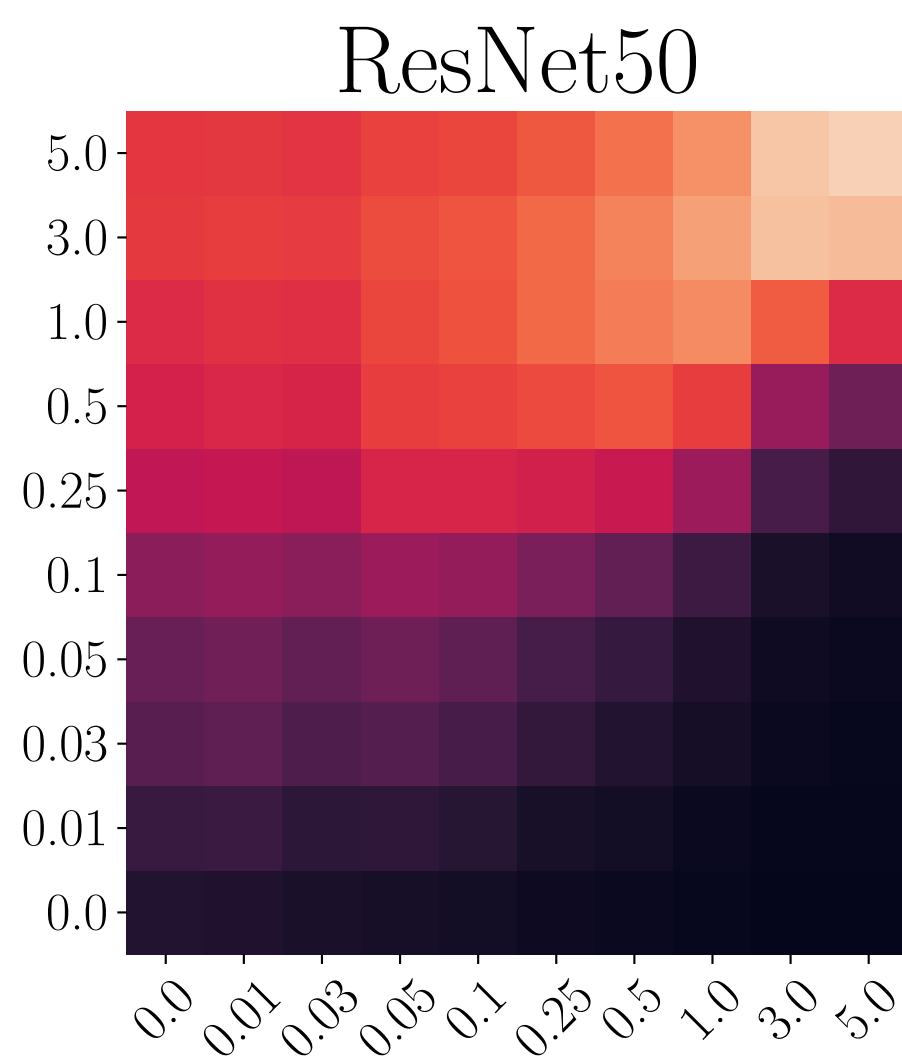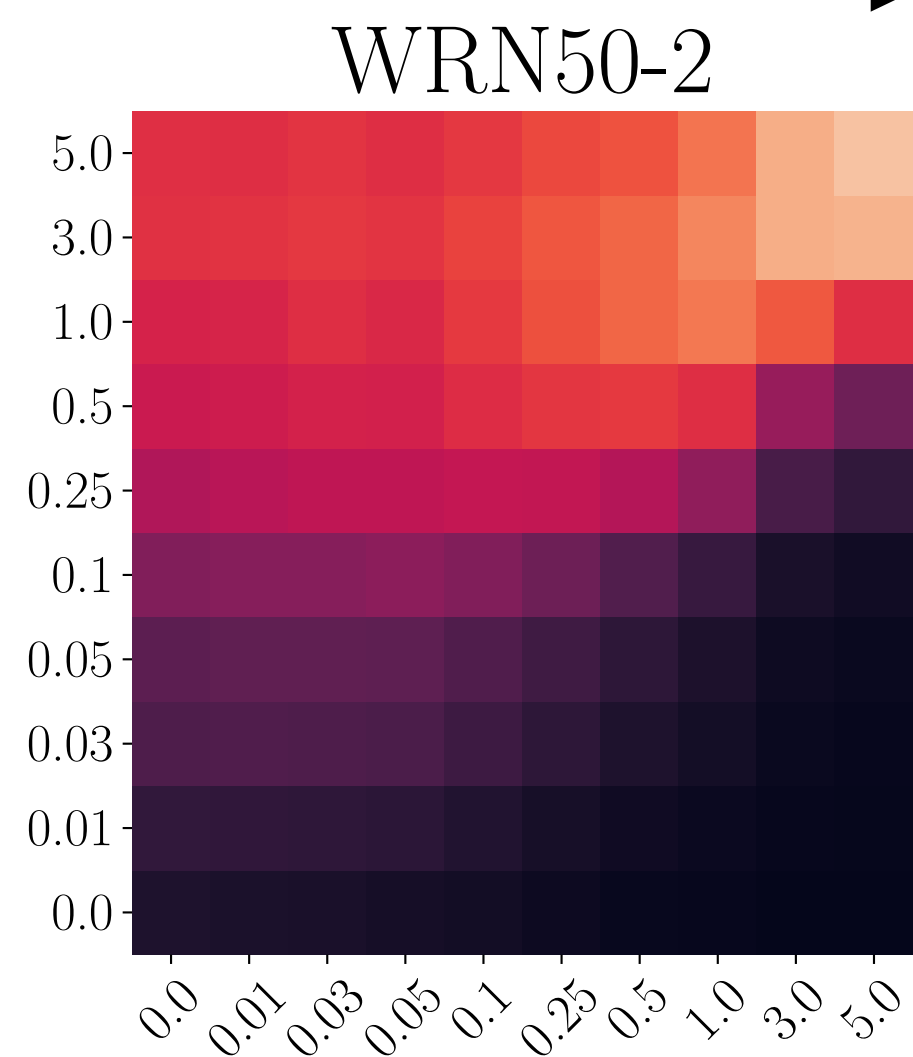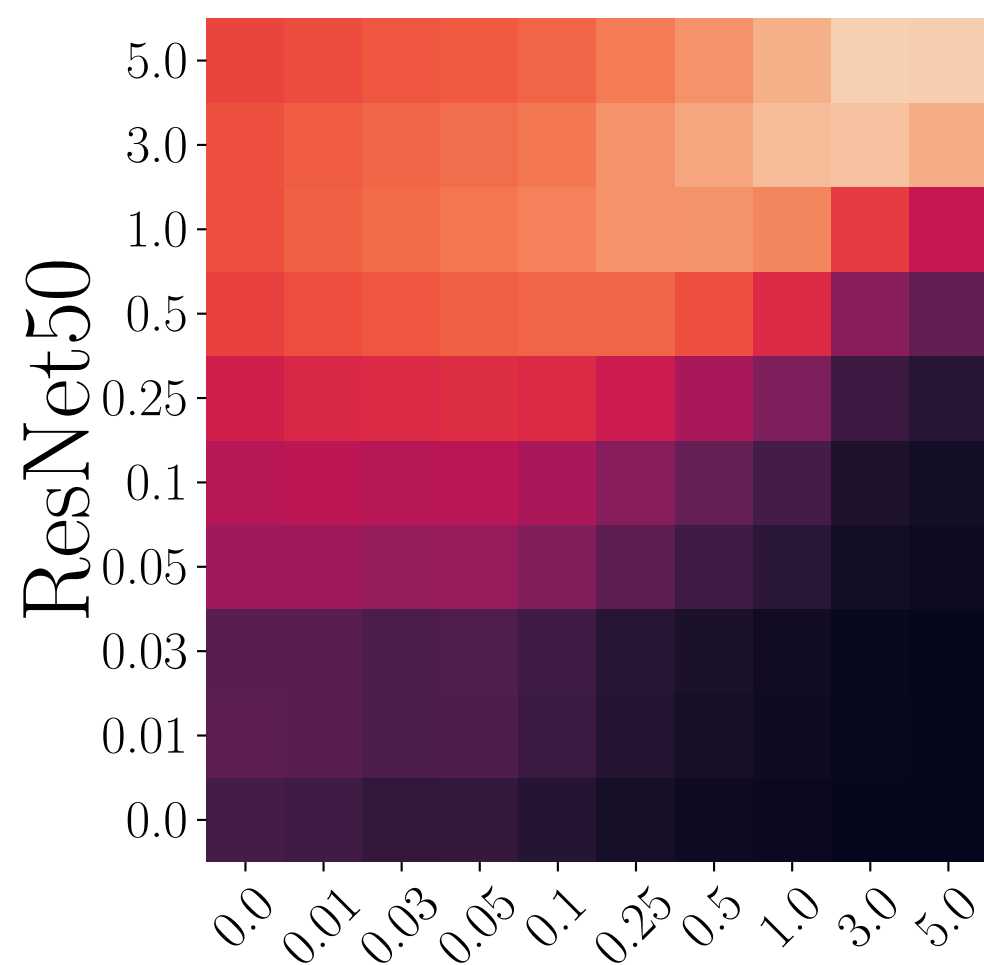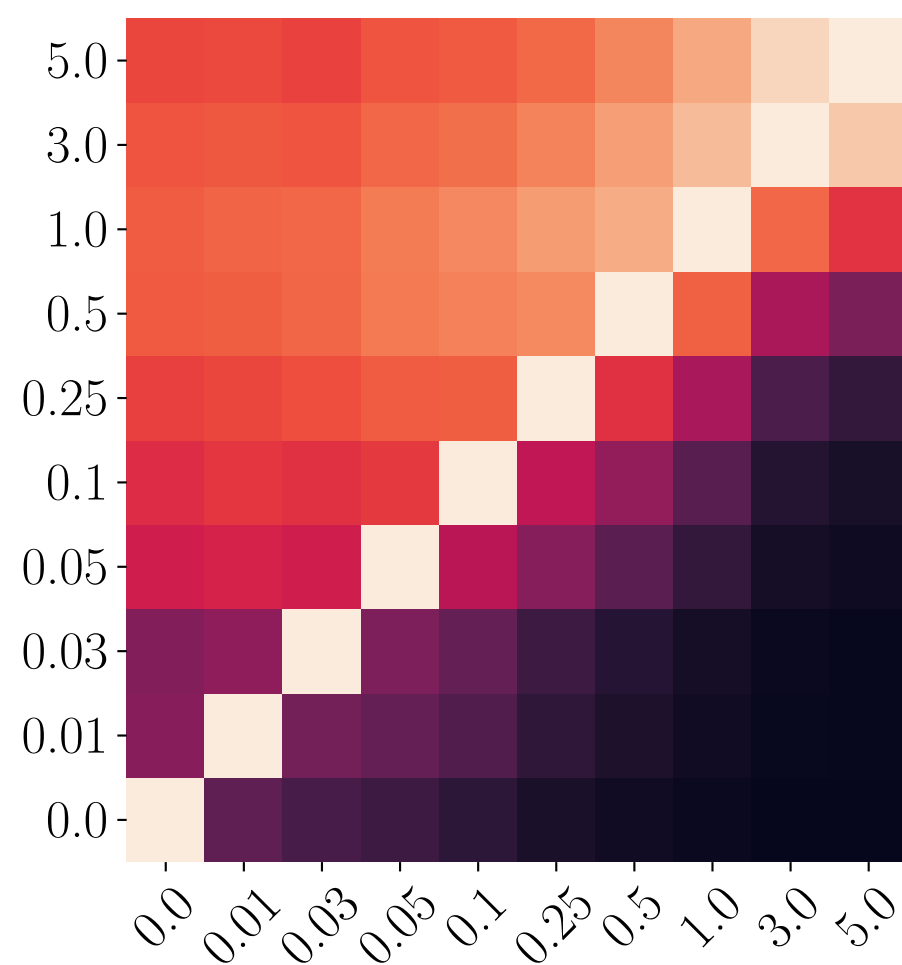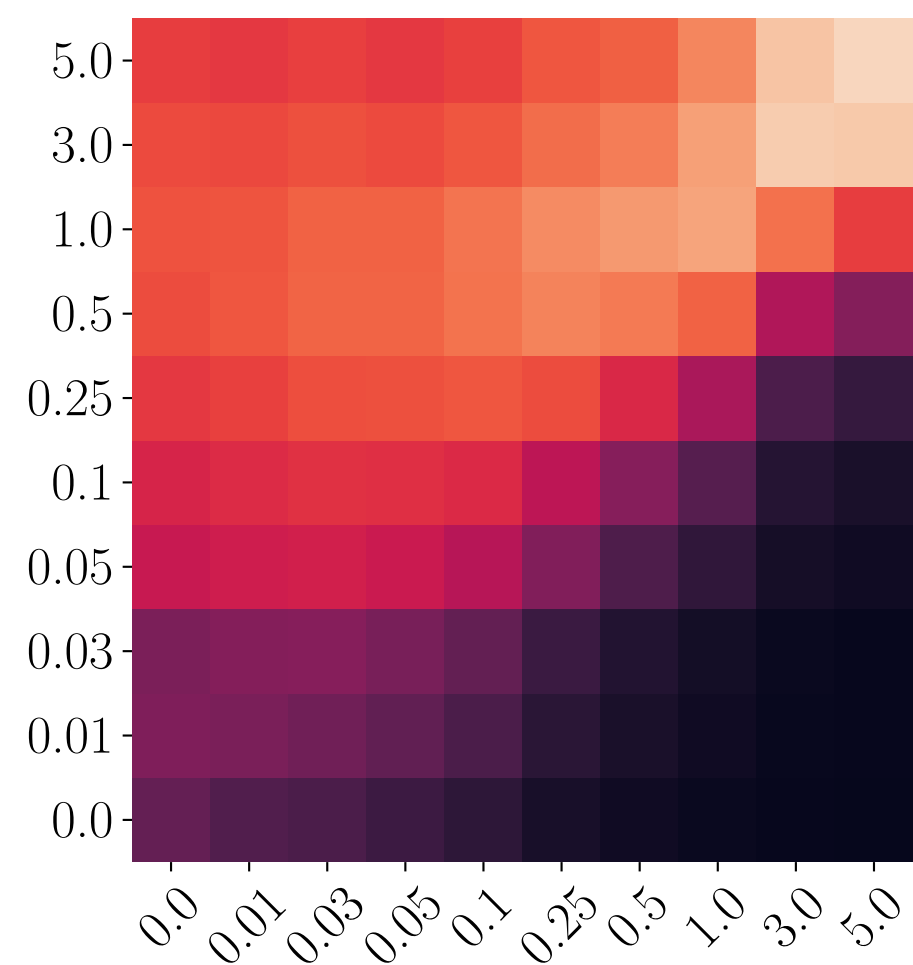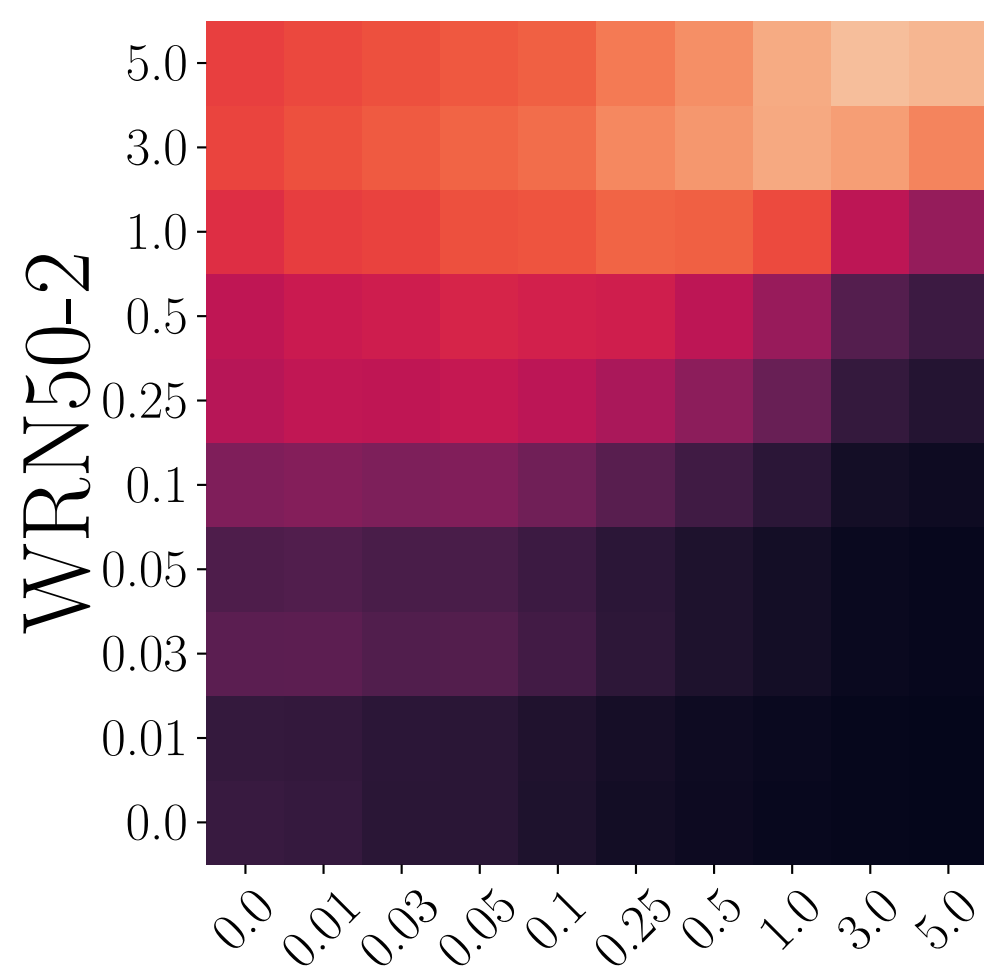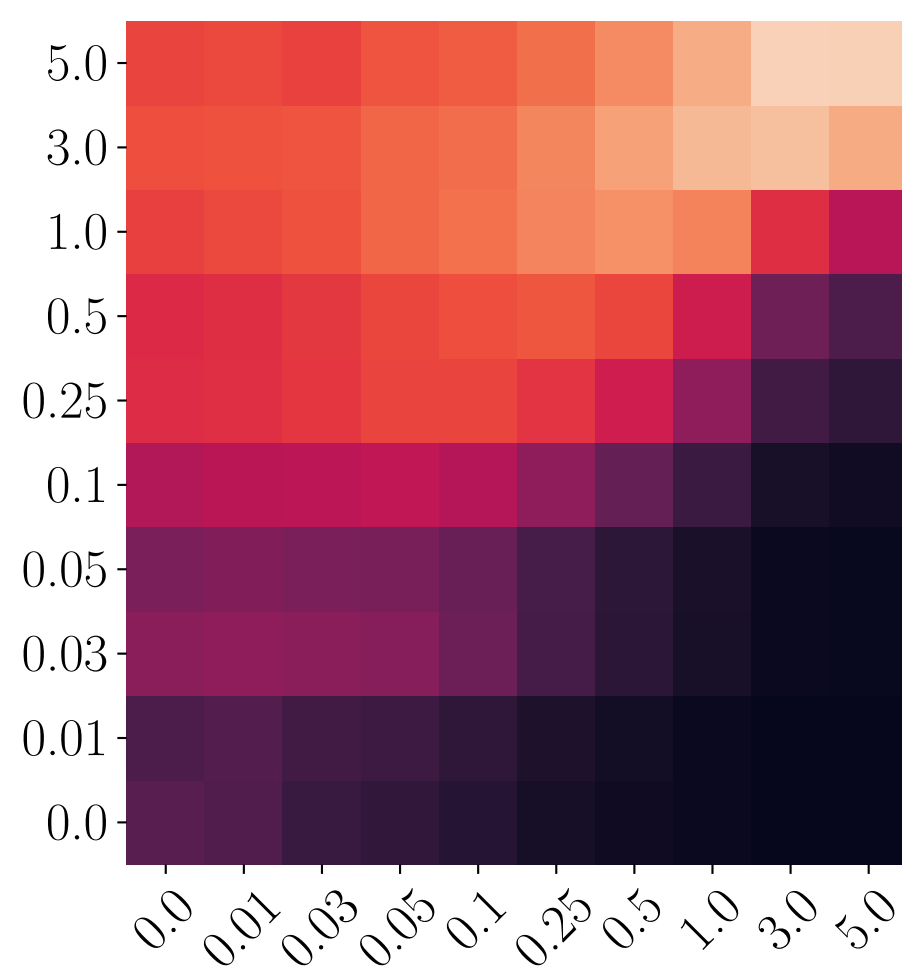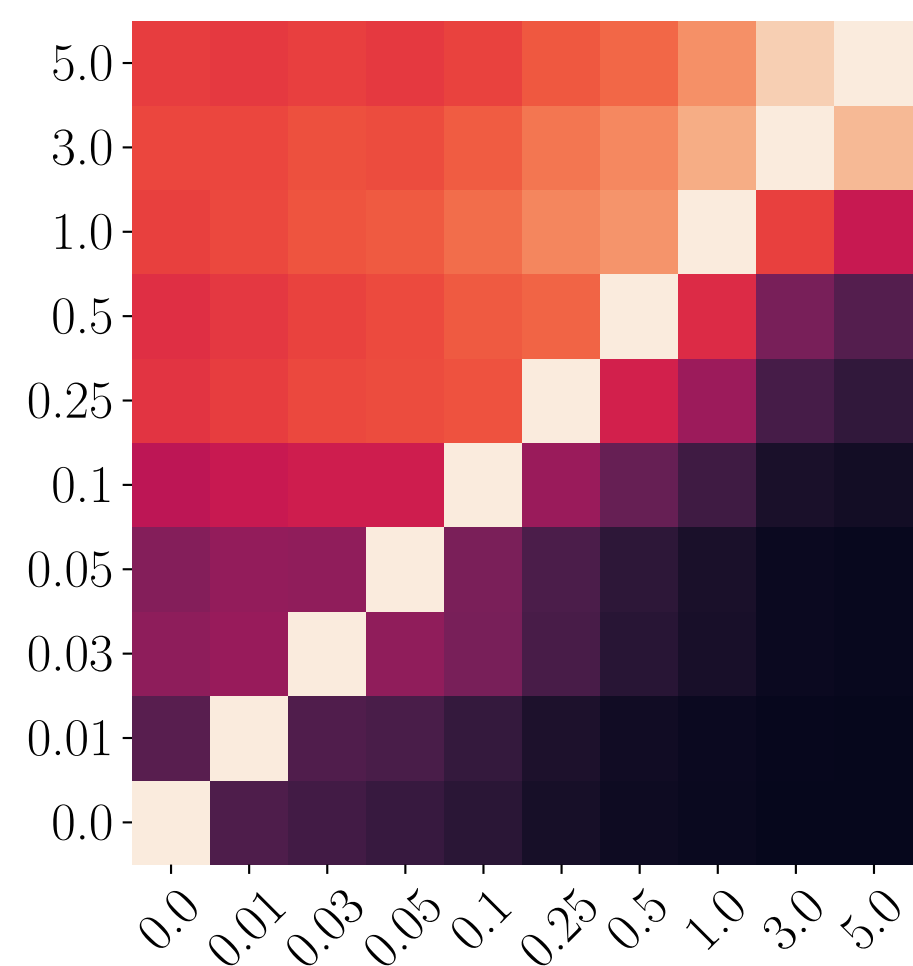

Supplement: supplementary_material [file attachment]

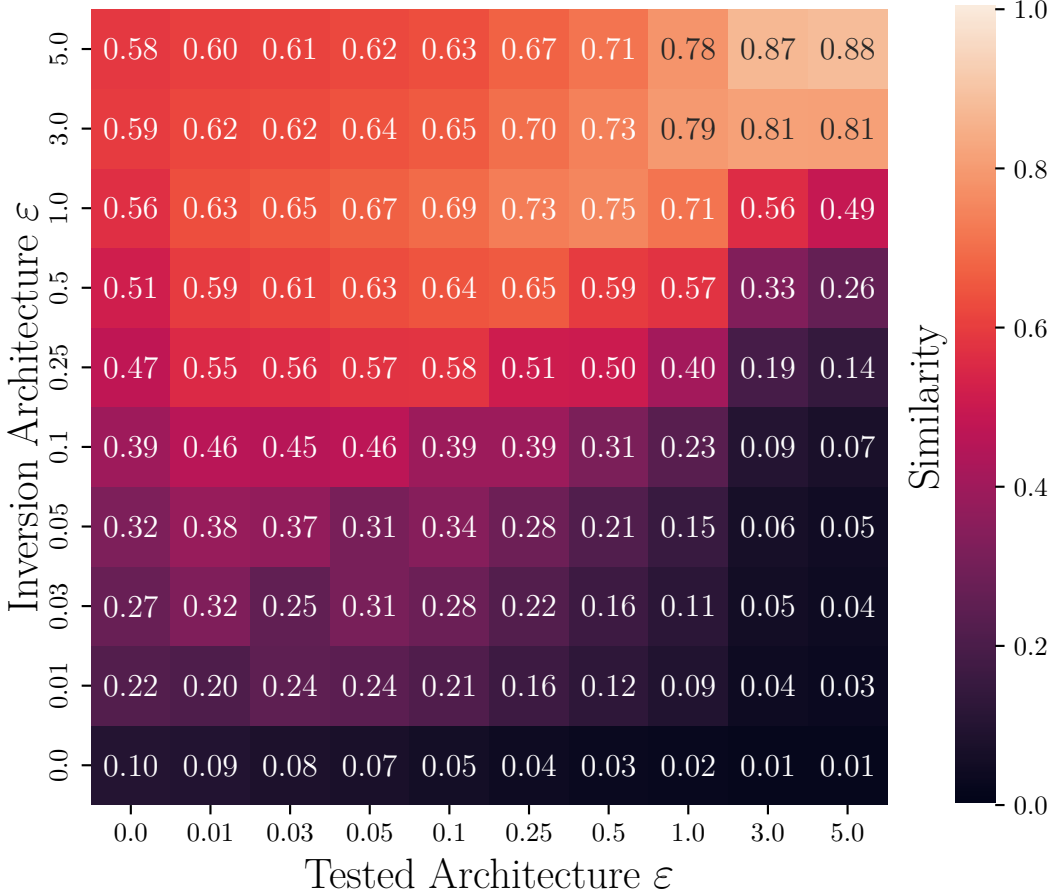

Supplement: supplementary_material [file attachment]

# Head/Body Agree

Agreement

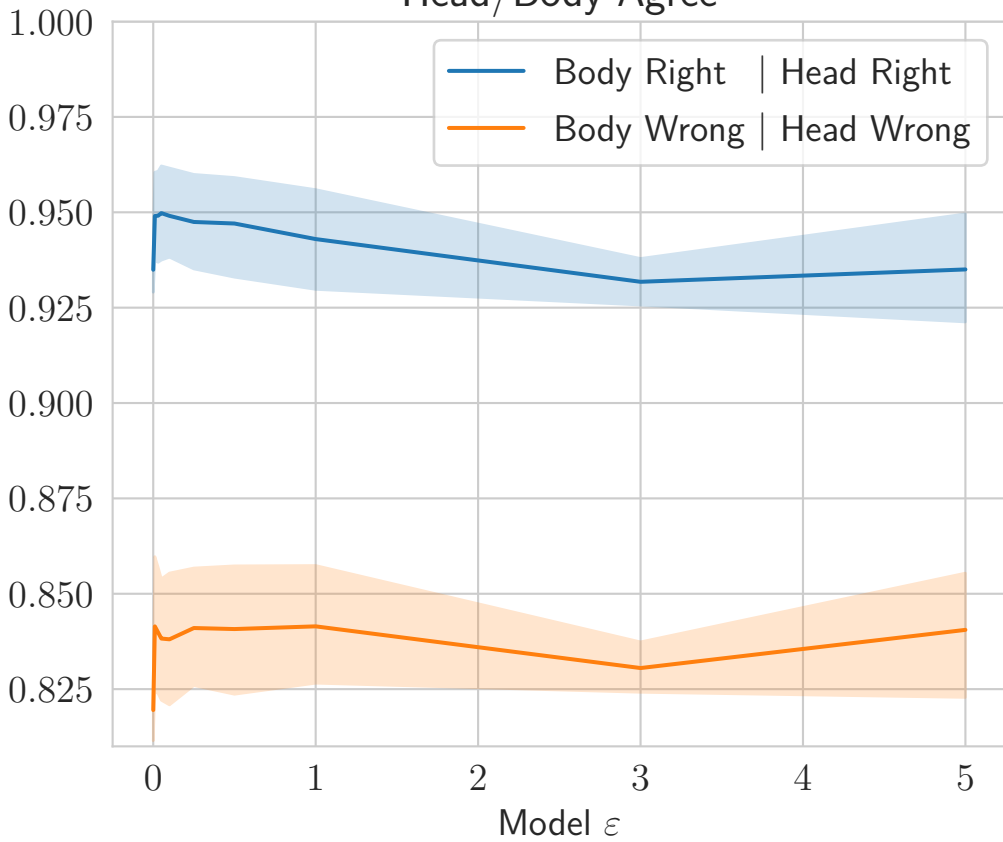

Supplement: supplementary_material [file attachment]
